# Supplementary figures and images for: Atrazine Inhalation Causes Neuroinflammation, Apoptosis and Accelerating Brain Aging
Source: MDPI journal article supplement (doi:10.3390/ijms22157938), 2021-07-26

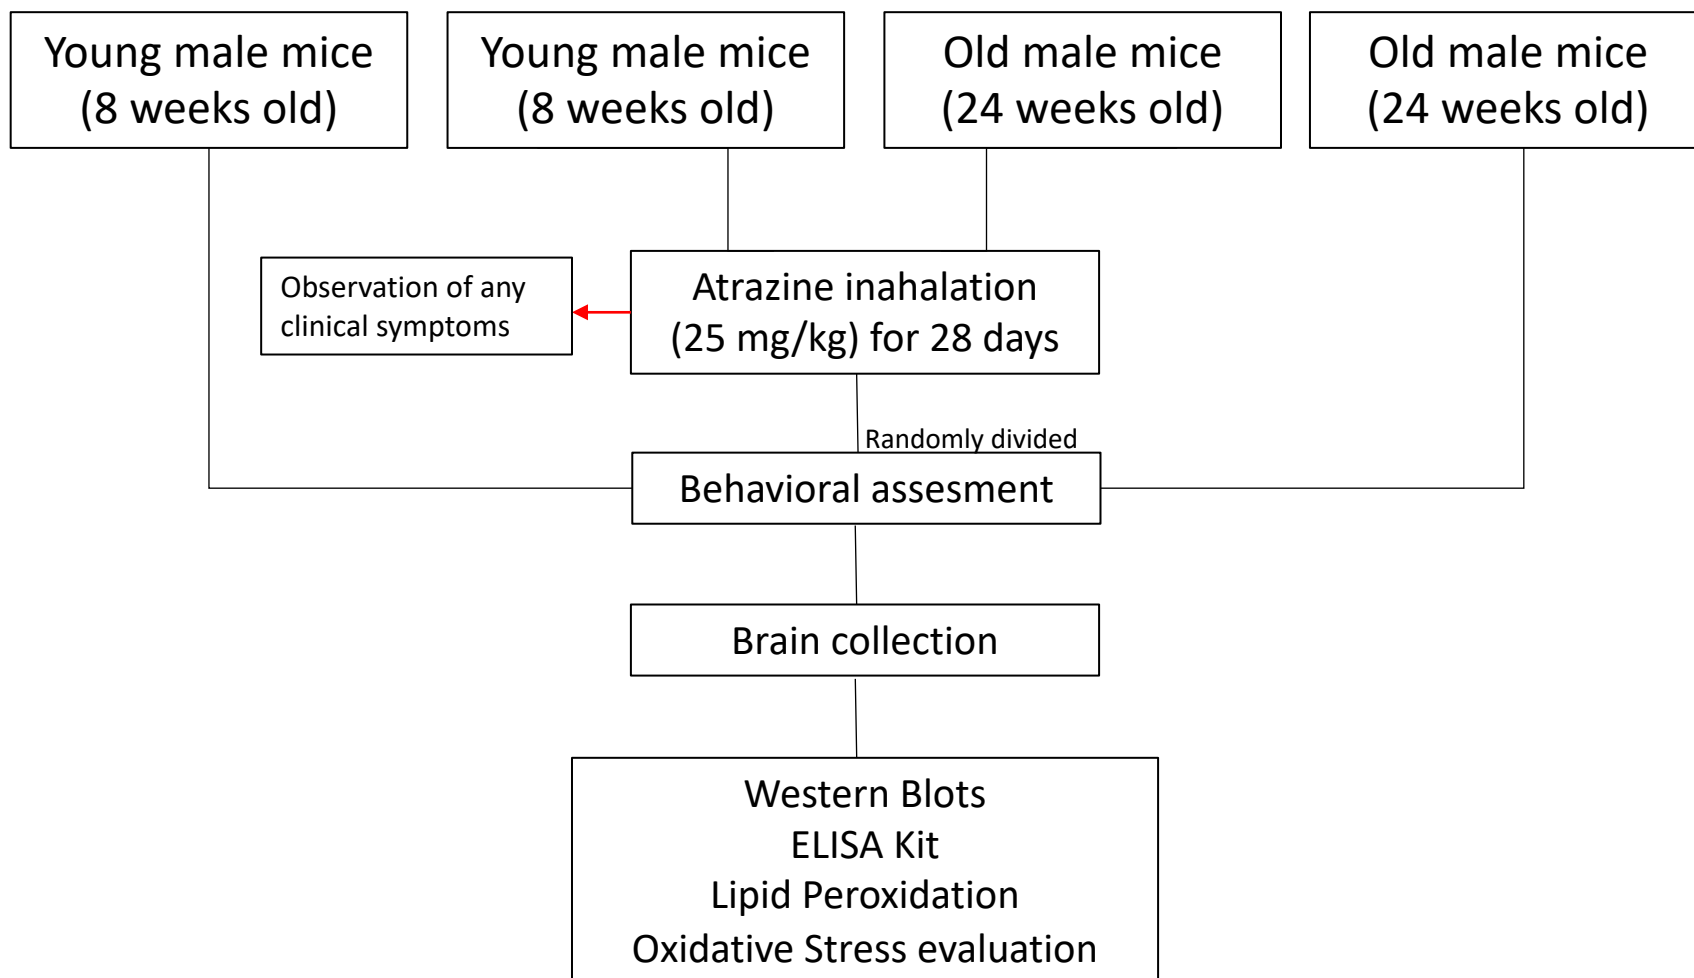

Supplement: s1 [file s1]
